# Supplementary material for: The mechanism of γ-Secretase dysfunction in familial Alzheimer disease
Source: PubMed Central journal article supplement — EMBO J. 2012 Apr 13;31(10):2261–74. doi: 10.1038/emboj.2012.79 (PMC3364747; doi:10.1038/emboj.2012.79), 2012-04-13

# Supplementary 1

## A

Substrate-3XFLAG

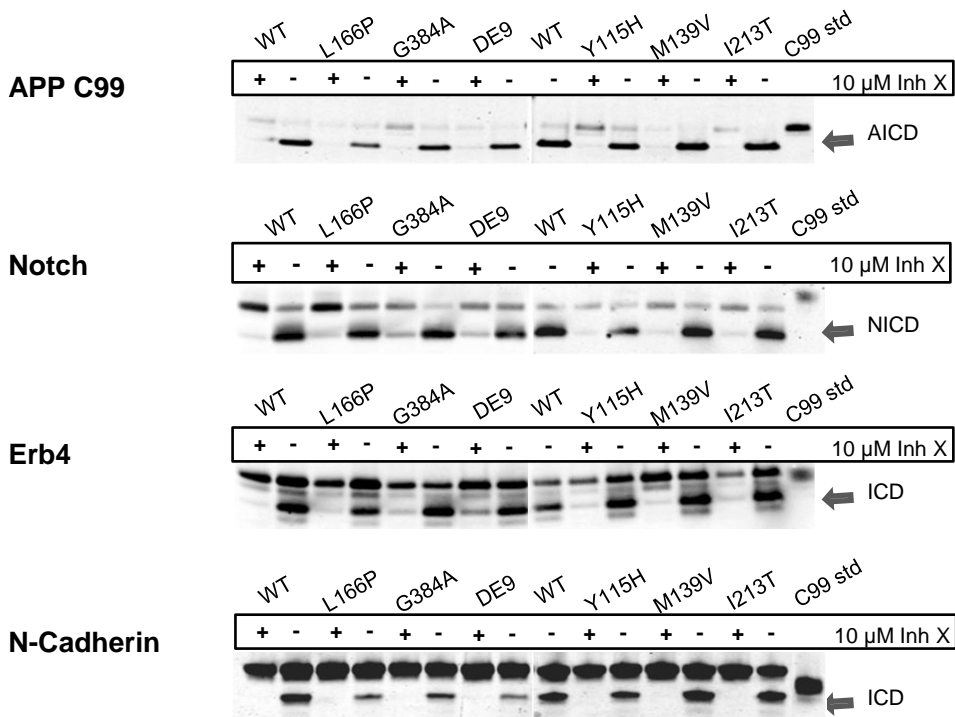

## B

APP C99- 3XFLAG

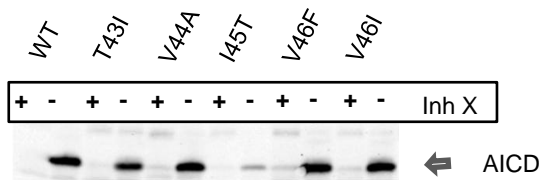

# Supplementary 2

## A

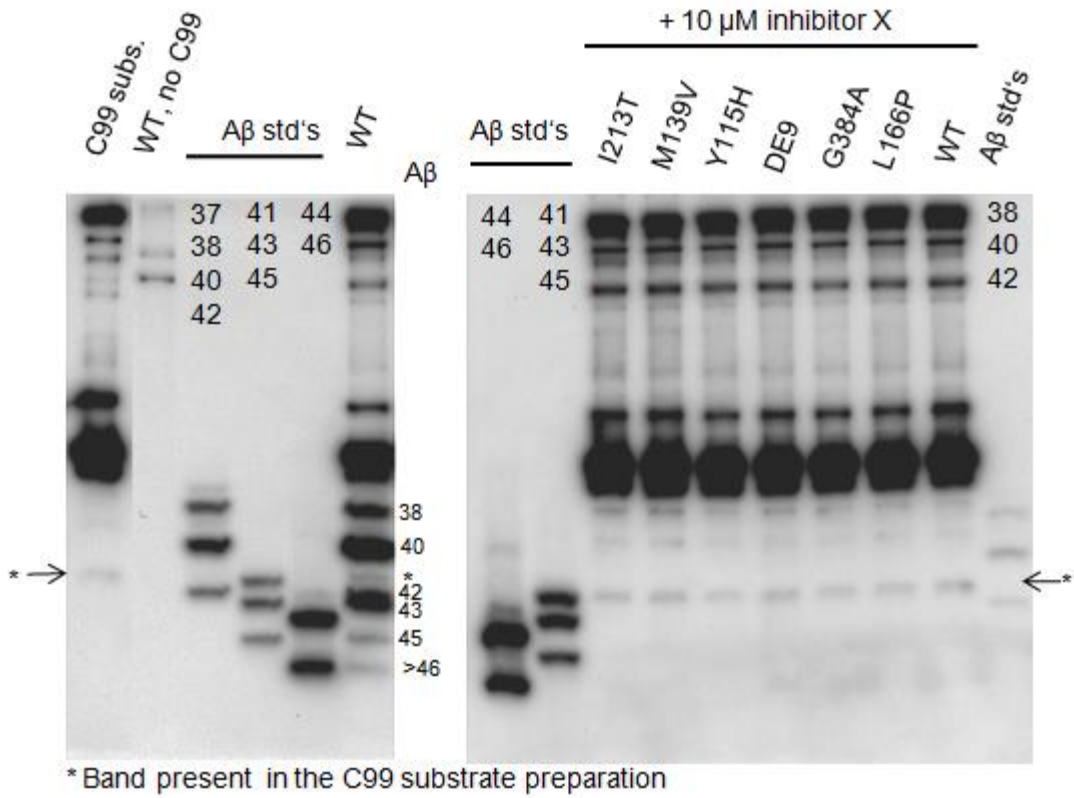

## B

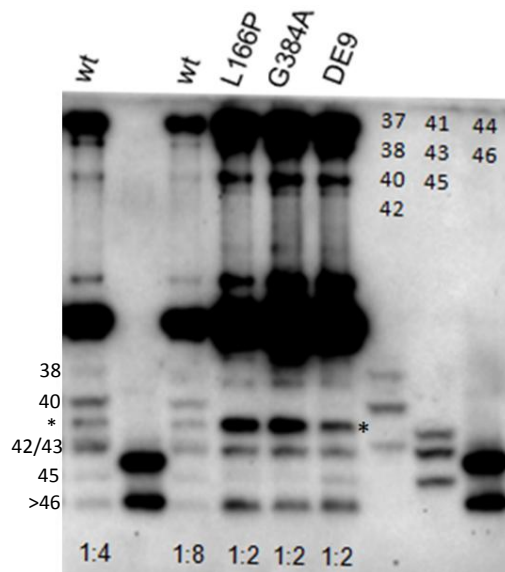

# Supplementary 3

**A** AICD<sub>50-62</sub> neo-antibody specificity:

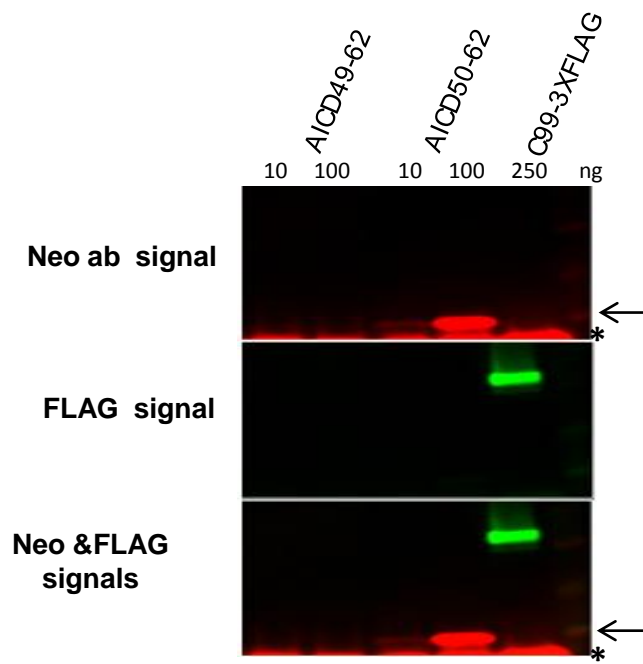

# Supplementary 4

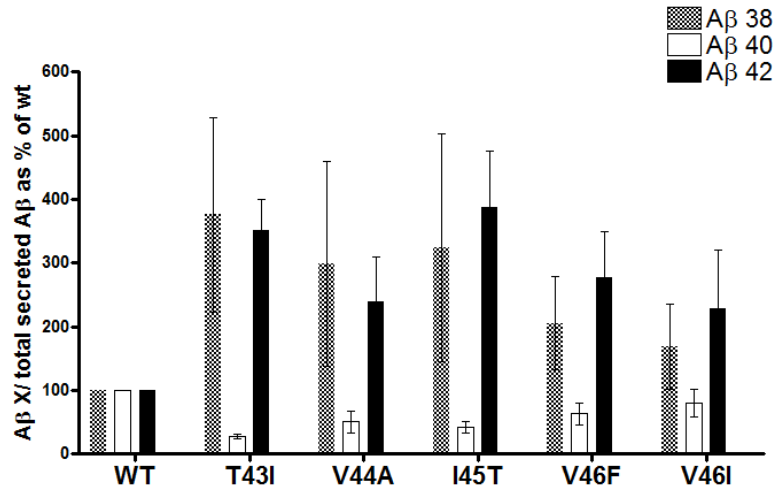

# Supplementary 5

A

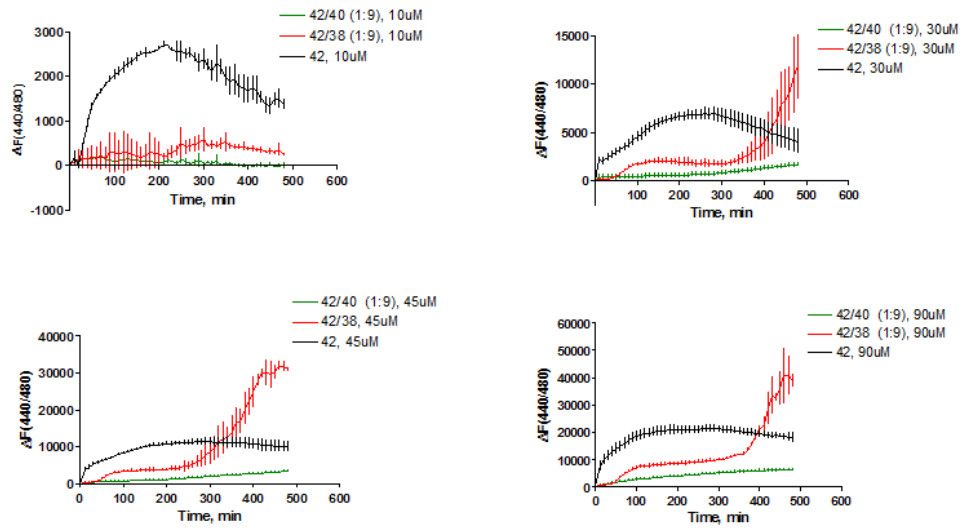

B

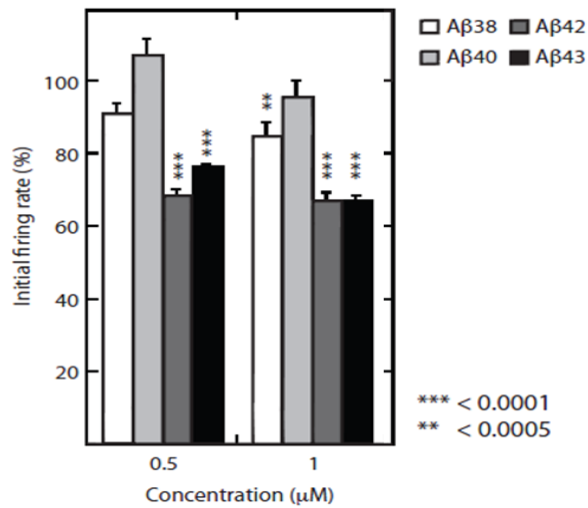

# Supplementary 6

## Semagacestat

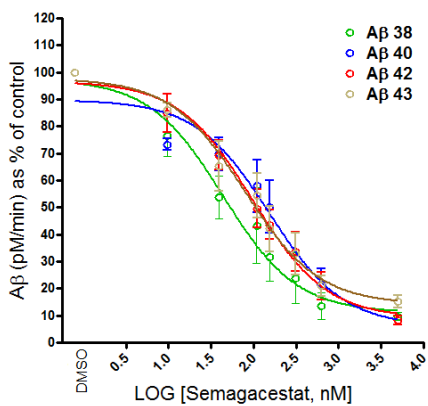

## Begacestat

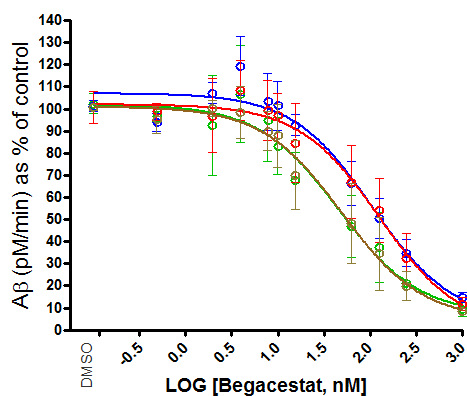

## Avagacestat

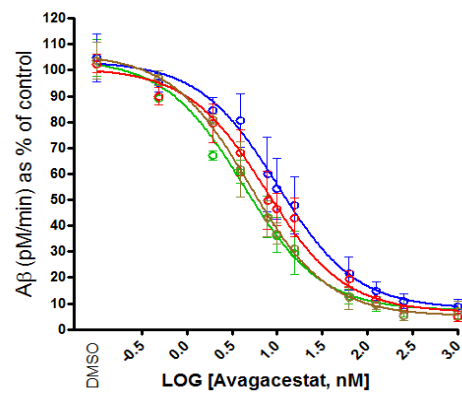

# Supplementary 7

## A

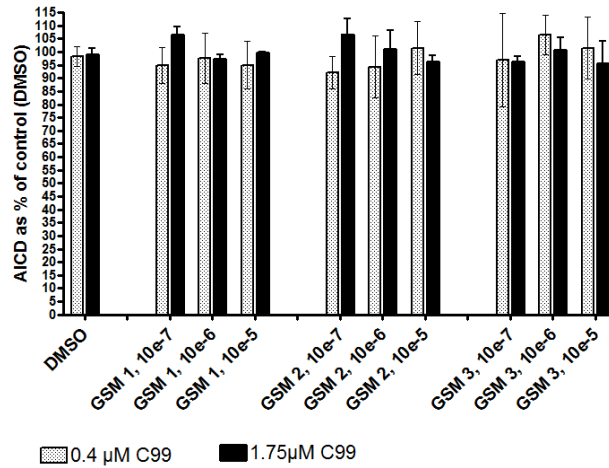

## B

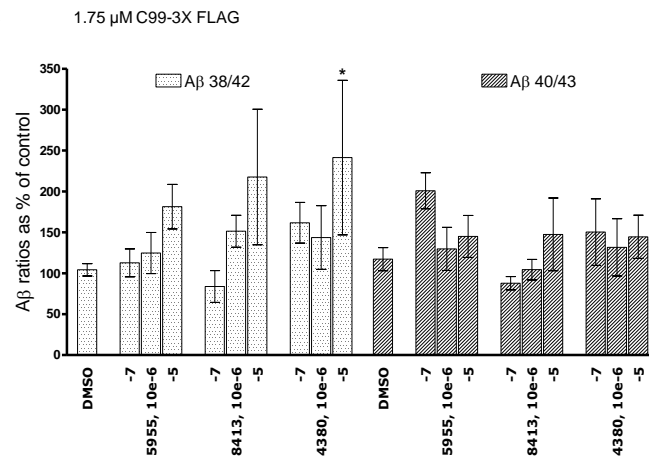

Supplement: emboj201279s2.pdf [file emboj201279s2.pdf]
